# Supplementary material for: Fully Characterized Effective Bacteriophages Specific against Antibiotic-Resistant Enterococcus faecalis, the Causative Agent of Dental Abscess
Source: MDPI journal article supplement (doi:10.3390/medicina60030501), 2024-03-19
Supplement: s1 [file s1]

### Supplementary file

**Table S1:** Functional annotation of comprehensive antibiotic resistance genes for *Enterococcus*\_phage

| Contig        | Start | Stop | (+/-) | Pass Bit score | Best Hit Bit score | Best Hit ARO | Best Identitie s | ARO id  | Drug Class                 | Resistance Mechanism | AMR Gene Family                              |
|---------------|-------|------|-------|----------------|--------------------|--------------|------------------|---------|----------------------------|----------------------|----------------------------------------------|
| MH618488.1_1  | 3     | 101  | -     | 275            | 23.8682            | AAC(6')-Ic   | 40               | 3002549 | Aminoglycoside             | Inactivation         | AAC(6')                                      |
| MH618488.1_2  | 148   | 1110 | -     | 500            | 25.0238            | OXA-636      | 27.78            | 3005857 | Carbapenem; cephalosporin  | Inactivation         | OXA beta-lactamase                           |
| MH618488.1_3  | 1112  | 1378 | -     | 960            | 22.3274            | efrA         | 100              | 3003948 | Fluoroquinolone; rifamycin | Antibiotic efflux    | ATP-binding cassette (ABC) antibiotic efflux |
| MH618488.1_4  | 1371  | 1619 | -     | 600            | 22.7126            | emtA         | 38.89            | 3004669 | Lincosamide; orthosomycin  | Target alteration    | Non-erm 23S ribosomal RNA methyltransferase  |
| MH618488.1_5  | 1633  | 1842 | -     | 700            | 23.8682            | OCH-3        | 42.86            | 3002516 | Monobactam; cephamycin     | Inactivation         | OCH beta-lactamase                           |
| MH618488.1_7  | 2051  | 2275 | -     | 960            | 24.2534            | efrA         | 30.19            | 3003948 | Macrolide fluoroquinolone  | Antibiotic efflux    | ATP-binding cassette (ABC) efflux pump       |
| MH618488.1_9  | 2532  | 2726 | -     | 900            | 24.2534            | otr(B)       | 31.43            | 3002892 | Tetracycline               | Antibiotic efflux    | Major facilitator superfamily (MFS)          |
| MH618488.1_10 | 2805  | 3236 | -     | 500            | 25.7942            | NDM-10       | 27.59            | 3002360 | Carbapenem; cephalosporin; | Inactivation         | NDM beta-lactamase                           |
| MH618488.1_11 | 3249  | 3449 | -     | 275            | 22.3274            | AAC (6')-Iy  | 33.33            | 3002569 | Aminoglycoside             | Inactivation         | AAC(6')                                      |
| MH618488.1_12 | 3460  | 4044 | -     | 500            | 24.2534            | ErmH         | 47.06            | 3002823 | Lincosamide streptogramin  | Target alteration    | Erm 23S ribosomal RNA methyltransferase      |
| MH618488.1_13 | 4045  | 4503 | -     | 500            | 24.2534            | OXA-25       | 42.86            | 3001420 | Carbapenem; cephalosporin  | Inactivation         | OXA beta-lactamase                           |
| MH618488.1_14 | 4562  | 5257 | -     | 1800           | 25.7942            | mdtB         | 33.33            | 3000793 | Aminocoumarin              | Antibiotic efflux    | Resistance-nodulation-cell division (RND)    |
| MH618488.1_15 | 5250  | 5642 | -     | 600            | 26.9498            | CfxA6        | 33.33            | 3003097 | Cepharmycin                | Inactivation         | CfxA beta-lactamase                          |
| MH618488.1_16 | 5644  | 6078 | -     | 700            | 25.409             | CMA-1        | 18.18            | 3006922 | Cephalosporin              | Inactivation         | CMA beta-lactamase                           |
| MH618488.1_19 | 8767  | 9144 | -     | 225            | 25.7942            | FosB         | 29.41            | 3000172 | Phosphonic acid antibiotic | Inactivation         | Fosfomycin thiol transferase                 |
| MH618488.1_20 | 9145  | 9354 | -     | 600            | 21.9422            | PRC-1        | 25               | 3007085 | Cephalosporin              | Inactivation         | PRC beta-lactamase                           |

|               |       |       |   |      |         |                     |       |         |                                 |                    |                                                                  |
|---------------|-------|-------|---|------|---------|---------------------|-------|---------|---------------------------------|--------------------|------------------------------------------------------------------|
| MH618488.1_21 | 9357  | 9566  | - | 500  | 24.6386 | <b>cfrC</b>         | 34.62 | 3004146 | Streptogramin oxazolidinone     | Target alteration  | Cfr 23S ribosomal RNA methyltransferase                          |
| MH618488.1_23 | 9802  | 9996  | - | 1900 | 22.3274 | <b>AcrF</b>         | 30    | 3000502 | Fluoroquinolone; cephalosporin; | antibiotic efflux  | Resistance-nodulation-cell division (RND)                        |
| MH618488.1_24 | 9997  | 10176 | - | 700  | 24.2534 | <b>CMA-2</b>        | 36.11 | 3006923 | Cephalosporin                   | inactivation       | CMA beta-lactamase                                               |
| MH618488.1_25 | 10189 | 10362 | - | 900  | 28.8758 | <b>emrY</b>         | 35.29 | 3000254 | Tetracycline antibiotic         | Antibiotic efflux  | Major facilitator superfamily (MFS) efflux pump                  |
| MH618488.1_27 | 10713 | 11276 | - | 300  | 25.7942 | <b>dfrA24</b>       | 33.33 | 3002856 | Diaminopyrimidine               | Target replacement | Trimethoprim resistant dihydrofolate reductase dfr               |
| MH618488.1_28 | 11368 | 12000 | - | 1000 | 26.1794 | <b>HelR</b>         | 30    | 3007208 | Rifamycin antibiotic            | Target protection  | Helicase-like RNA polymerase protection protein                  |
| MH618488.1_30 | 12559 | 12993 | - | 500  | 25.7942 | <b>TEM-90</b>       | 30.3  | 3000957 | Monobactam; cephalosporin;      | Inactivation       | TEM beta-lactamase                                               |
| MH618488.1_31 | 13130 | 13459 | - | 750  | 23.483  | <b>pmrA</b>         | 40    | 3000822 | Fluoroquinolone                 | Antibiotic efflux  | Major facilitator superfamily (MFS) antibiotic efflux pump       |
| MH618488.1_33 | 14480 | 14920 | - | 450  | 27.335  | <b>lnuG</b>         | 35.59 | 3004085 | Lincosamide                     | Inactivation       | Lincosamide nucleotidyltransferase (LNU)                         |
| MH618488.1_34 | 14993 | 15253 | - | 150  | 22.7126 | <b>nimH</b>         | 26.92 | 3007110 | Nitroimidazole                  | Inactivation       | Nitroimidazole reductase                                         |
| MH618488.1_35 | 15277 | 15489 | - | 810  | 23.0978 | <b>cdeA</b>         | 40.74 | 3003835 | Fluoroquinolone                 | Antibiotic efflux  | Multidrug and toxic compound extrusion (MATE) transporter        |
| MH618488.1_36 | 15455 | 16207 | - | 550  | 25.409  | <b>APH(2'')-IVa</b> | 28.21 | 3002637 | Aminoglycoside antibiotic       | Inactivation       | APH (2'')                                                        |
| MH618488.1_37 | 16220 | 17584 | - | 2130 | 26.1794 | <b>mtrD</b>         | 27.66 | 3000811 | Macrolide antibiotic; penam     | Antibiotic efflux  | Resistance-nodulation-cell division (RND) antibiotic efflux pump |

|               |       |           |   |      |             |                                       |       |         |                                           |                      |                                                                           |
|---------------|-------|-----------|---|------|-------------|---------------------------------------|-------|---------|-------------------------------------------|----------------------|---------------------------------------------------------------------------|
| MH618488.1_38 | 17596 | 1837<br>2 | - | 2200 | 28.105<br>4 | Iles<br>resistance<br>to<br>mupirocin | 30.23 | 3003730 | Mupirocin-<br>like antibiotic             | Target<br>alteration | Antibiotic-<br>resistant<br>isoleucyl-tRNA<br>synthetase<br>(ileS)        |
| MH618488.1_39 | 18421 | 1877<br>4 | - | 1900 | 24.253<br>4 | MexK                                  | 40.91 | 3003693 | Macrolide;<br>tetracycline                | Antibiotic<br>efflux | Resistance-<br>nodulation-cell<br>division (RND)                          |
| MH618488.1_40 | 18849 | 1979<br>3 | - | 50   | 25.023<br>8 | vanY gene<br>in vanA<br>cluster       | 37.78 | 3002955 | Glycopeptide                              | Target<br>alteration | VanY;<br>glycopeptide<br>resistance gene                                  |
| MH618488.1_41 | 19823 | 2003<br>5 | - | 700  | 25.023<br>8 | vanS gene<br>in vanM<br>cluster       | 34.21 | 3002939 | Glycopeptide                              | Target<br>alteration | VanS;<br>glycopeptide<br>resistance gene                                  |
| MH618488.1_42 | 20047 | 2023<br>5 | - | 300  | 24.253<br>4 | tet[35]                               | 43.75 | 3000556 | Tetracycline                              | Target<br>protection | Tetracycline-<br>resistant<br>ribosomal<br>protection<br>protein          |
| MH618488.1_43 | 20249 | 2040<br>1 | - | 880  | 21.171<br>8 | arlS                                  | 42.86 | 3000839 | Fluoroquinolo<br>ne                       | Antibiotic<br>efflux | Major<br>facilitator<br>superfamily<br>(MFS)<br>antibiotic efflux<br>pump |
| MH618488.1_44 | 20401 | 2073<br>3 | - | 400  | 24.638<br>6 | C.butyricu<br>m catB                  | 25.86 | 3002674 | Phenicol<br>antibiotic                    | Inactivation         | Chloramphenic<br>ol<br>acetyltransferas<br>e (CAT)                        |
| MH618488.1_45 | 20733 | 2098<br>4 | - | 300  | 24.253<br>4 | AAC[36]-<br>Ia                        | 52.63 | 3002528 | Aminoglycosi<br>de                        | Inactivation         | AAC [36]                                                                  |
| MH618488.1_46 | 20984 | 2122<br>9 | - | 500  | 24.638<br>6 | PER-11                                | 25    | 3006132 | Cephalosporin                             | Inactivation         | PER beta-<br>lactamase                                                    |
| MH618488.1_47 | 22038 | 2231<br>3 | - | 1200 | 24.253<br>4 | TaeA                                  | 39.29 | 3003986 | Pleuromutilin<br>antibiotic               | Antibiotic<br>efflux | ATP-binding<br>cassette (ABC)<br>antibiotic efflux<br>pump                |
| MH618488.1_48 | 22348 | 2254<br>8 | - | 750  | 24.638<br>6 | bmr                                   | 25.45 | 3003007 | Fluoroquinolo<br>ne                       | Antibiotic<br>efflux | Major<br>facilitator<br>superfamily<br>(MFS)<br>antibiotic efflux<br>pump |
| MH618488.1_49 | 22548 | 2293<br>4 | - | 500  | 24.638<br>6 | PC1 beta-<br>lactamase                | 35.48 | 3000621 | Penam                                     | Inactivation         | BlaZ beta-<br>lactamase                                                   |
| MH618488.1_50 | 22937 | 2337<br>1 | - | 980  | 24.638<br>6 | opcM                                  | 30.23 | 3003037 | Fluoroquinolo<br>ne<br>aminoglycosid<br>e | Antibiotic<br>efflux | Resistance-<br>nodulation-cell<br>division (RND)                          |

|               |       |       |   |      |         |                           |       |         |                                     |                   |                                                            |
|---------------|-------|-------|---|------|---------|---------------------------|-------|---------|-------------------------------------|-------------------|------------------------------------------------------------|
| MH618488.1_51 | 23424 | 24248 | - | 2110 | 25.0238 | MexF                      | 40    | 3000804 | Fluoroquinolone diaminopyrimidine   | Antibiotic efflux | Resistance-nodulation-cell division (RND)                  |
| MH618488.1_53 | 24961 | 25389 | + | 500  | 26.1794 | CARB-6                    | 50    | 3002245 | Penam                               | Inactivation      | CARB beta-lactamase                                        |
| MH618488.1_54 | 25673 | 26386 | - | 600  | 30.0314 | rgt1438                   | 29.31 | 3002883 | Rifamycin antibiotic                | Inactivation      | Rifampin glycosyltransferase                               |
| MH618488.1_55 | 26433 | 26786 | - | 500  | 23.8682 | OXA-85                    | 28.95 | 3001780 | Carbapenem; cephalosporin;          | Inactivation      | OXA beta-lactamase                                         |
| MH618488.1_56 | 26734 | 29760 | - | 400  | 33.4982 | kamB                      | 26.42 | 3004102 | Aminoglycoside                      | Target alteration | 16S rRNA methyltransferase (A1408)                         |
| MH618488.1_57 | 29773 | 33765 | - | 1320 | 27.7202 | lmrD                      | 41.67 | 3002882 | Lincosamide                         | Antibiotic efflux | ATP-binding cassette (ABC) antibiotic efflux pump          |
| MH618488.1_58 | 33779 | 36664 | - | 500  | 26.9498 | OXA-896                   | 31.15 | 3006087 | carbapenem                          | Inactivation      | OXA beta-lactamase                                         |
| MH618488.1_59 | 36677 | 36901 | - | 1800 | 25.7942 | MexD                      | 27.66 | 3000801 | Fluoroquinolone; diaminopyrimidine  | Antibiotic efflux | Resistance-nodulation-cell division (RND)                  |
| MH618488.1_61 | 37496 | 38185 | - | 1000 | 25.409  | efpA                      | 44.44 | 3003955 | rifamycin                           | Antibiotic efflux | Major facilitator superfamily (MFS) antibiotic efflux pump |
| MH618488.1_63 | 38653 | 39033 | - | 200  | 23.8682 | vanT gene in vanE cluster | 30.3  | 3002971 | Glycopeptide                        | Target alteration | Glycopeptide resistance gene; vanT                         |
| MH618488.1_66 | 39875 | 40315 | - | 420  | 23.8682 | OXA-140                   | 30.38 | 3001452 | Carbapenem; cephalosporin;          | Inactivation      | OXA beta-lactamase                                         |
| MH618488.1_67 | 40470 | 41276 | - | 700  | 26.9498 | cmx                       | 41.86 | 3002703 | Phenicol antibiotic                 | Antibiotic efflux | Major facilitator superfamily (MFS) antibiotic efflux pump |
| MH618488.1_68 | 41325 | 41999 | - | 75   | 26.1794 | qacJ                      | 35.71 | 3007014 | Disinfecting agents and antiseptics | Antibiotic efflux | Small multidrug resistance [37] antibiotic efflux pump     |
| MH618488.1_69 | 42110 | 42865 | - | 200  | 26.1794 | vanX gene in vanO cluster | 41.67 | 3002954 | Glycopeptide antibiotic             | Target alteration | VanX; Glycopeptide                                         |

|               |       |       |   |      |         |                                     |       |         |                               |                    | resistance gene cluster                                          |
|---------------|-------|-------|---|------|---------|-------------------------------------|-------|---------|-------------------------------|--------------------|------------------------------------------------------------------|
| MH618488.1_70 | 42877 | 44412 | - | 375  | 26.9498 | <b>AcrAB-TolC</b>                   | 34.04 | 3003807 | Fluoroquinolone; tetracycline | Target alteration; | Resistance-nodulation-cell division                              |
| MH618488.1_71 | 44469 | 45740 | - | 500  | 27.7202 | <b>aadS</b>                         | 23.85 | 3004683 | Aminoglycoside                | Inactivation       | ANT(6)                                                           |
| MH618488.1_73 | 46070 | 46450 | - | 450  | 25.0238 | <b>aadA9</b>                        | 30    | 3002609 | Aminoglycoside                | Inactivation       | ANT(3")                                                          |
| MH618488.1_74 | 46428 | 47027 | - | 600  | 26.5646 | <b>emrK</b>                         | 47.83 | 3000206 | Tetracycline                  | Antibiotic efflux  | Major facilitator superfamily (MFS)                              |
| MH618488.1_75 | 47308 | 47622 | + | 1080 | 23.483  | <b>rosB</b>                         | 42.11 | 3003049 | Peptide antibiotic            | Antibiotic efflux  | Major facilitator superfamily (MFS)                              |
| MH618488.1_76 | 47622 | 47879 | + | 500  | 22.3274 | <b>APH (6)-Id</b>                   | 32.65 | 3002660 | Aminoglycoside                | Inactivation       | APH(6)                                                           |
| MH618488.1_77 | 47881 | 48324 | + | 700  | 25.7942 | <b>DHA-2</b>                        | 55    | 3002133 | Cephalosporin;                | Inactivation       | DHA beta-lactamase                                               |
| MH618488.1_78 | 48328 | 48465 | + | 900  | 22.3274 | <b>tet(O/W/32/O)</b>                | 33.33 | 3007122 | Tetracycline                  | Target protection  | Tetracycline-resistant ribosomal                                 |
| MH618488.1_79 | 48490 | 48750 | + | 450  | 24.2534 | <b>OXA-573</b>                      | 43.75 | 3005325 | Carbapenem; cephalosporin;    | Inactivation       | OXA beta-lactamase                                               |
| MH618488.1_80 | 48752 | 48958 | + | 2300 | 25.0238 | <b>evgS</b>                         | 44.44 | 3000833 | Macrolide; fluoroquinolone    | Antibiotic efflux  | Major facilitator superfamily (MFS) efflux pump;                 |
| MH618488.1_81 | 48948 | 49250 | + | 2200 | 23.483  | <b>ileS resistance to mupirocin</b> | 50    | 3003730 | Mupirocin-like antibiotic     | Target alteration  | Antibiotic-resistant isoleucyl-tRNA synthetase (ileS)            |
| MH618488.1_83 | 50092 | 50757 | + | 400  | 26.1794 | <b>catB8</b>                        | 34.38 | 3002680 | Phenicol antibiotic           | Inactivation       | Chloramphenicol acetyltransferase (CAT)                          |
| MH618488.1_85 | 51627 | 51845 | + | 450  | 24.2534 | <b>rmtH</b>                         | 46.15 | 3003198 | Aminoglycoside antibiotic     | Target alteration  | 16S rRNA methyltransferase (G1405)                               |
| MH618488.1_86 | 51847 | 52059 | + | 1700 | 29.6462 | <b>LpeB</b>                         | 43.48 | 3004100 | Macrolide antibiotic          | Antibiotic efflux  | Resistance-nodulation-cell division (RND) antibiotic efflux pump |

|               |       |       |   |      |         |            |       |         |                                                     |                      |                                                             |
|---------------|-------|-------|---|------|---------|------------|-------|---------|-----------------------------------------------------|----------------------|-------------------------------------------------------------|
| MH618488.1_88 | 54054 | 54488 | - | 850  | 26.1794 | hp1181     | 28    | 3003964 | Fluoroquinolone;<br>tetracycline;<br>nitroimidazole | Antibiotic<br>efflux | Major<br>facilitator<br>superfamily<br>(MFS) efflux<br>pump |
| MH618488.1_89 | 54625 | 54879 | - | 1000 | 25.7942 | MCR-3.12   | 37.04 | 3004693 | Peptide<br>antibiotic                               | Target<br>alteration | MCR<br>phosphoethanol<br>amine<br>transferase               |
| MH618488.1_91 | 55161 | 55535 | - | 1900 | 26.9498 | MexK       | 28.21 | 3003693 | Macrolide;<br>tetracycline                          | Antibiotic<br>efflux | Resistance-<br>modulation-cell<br>division (RND)            |
| MH618488.1_94 | 56015 | 56254 | - | 500  | 23.8682 | APH (6)-Ia | 26.83 | 3002657 | Aminoglycoside<br>antibiotic                        | Inactivation         | APH(6)                                                      |
| MH618488.1_95 | 57112 | 57624 | - | 725  | 25.409  | SRT-1      | 25.3  | 3002493 | Cephalosporin                                       | Inactivation         | SRT beta-<br>lactamase                                      |
| MH618488.1_96 | 57627 | 57809 | - | 200  | 23.8682 | tet(37)    | 37.5  | 3002871 | Tetracycline<br>antibiotic                          | Inactivation         | Tetracycline<br>inactivation<br>enzyme                      |
